# Supplementary material for: Flame retardancy materials based on a novel fully end-capped hyperbranched polysiloxane and bismaleimide/diallylbisphenol A resin with simultaneously improved integrated performance
Source: Royal Society of Chemistry journal article supplement (doi:10.1039/c1jm10233h), 2011-01-01
Supplement: c1jm10233h.pdf [file c1jm10233h.pdf]

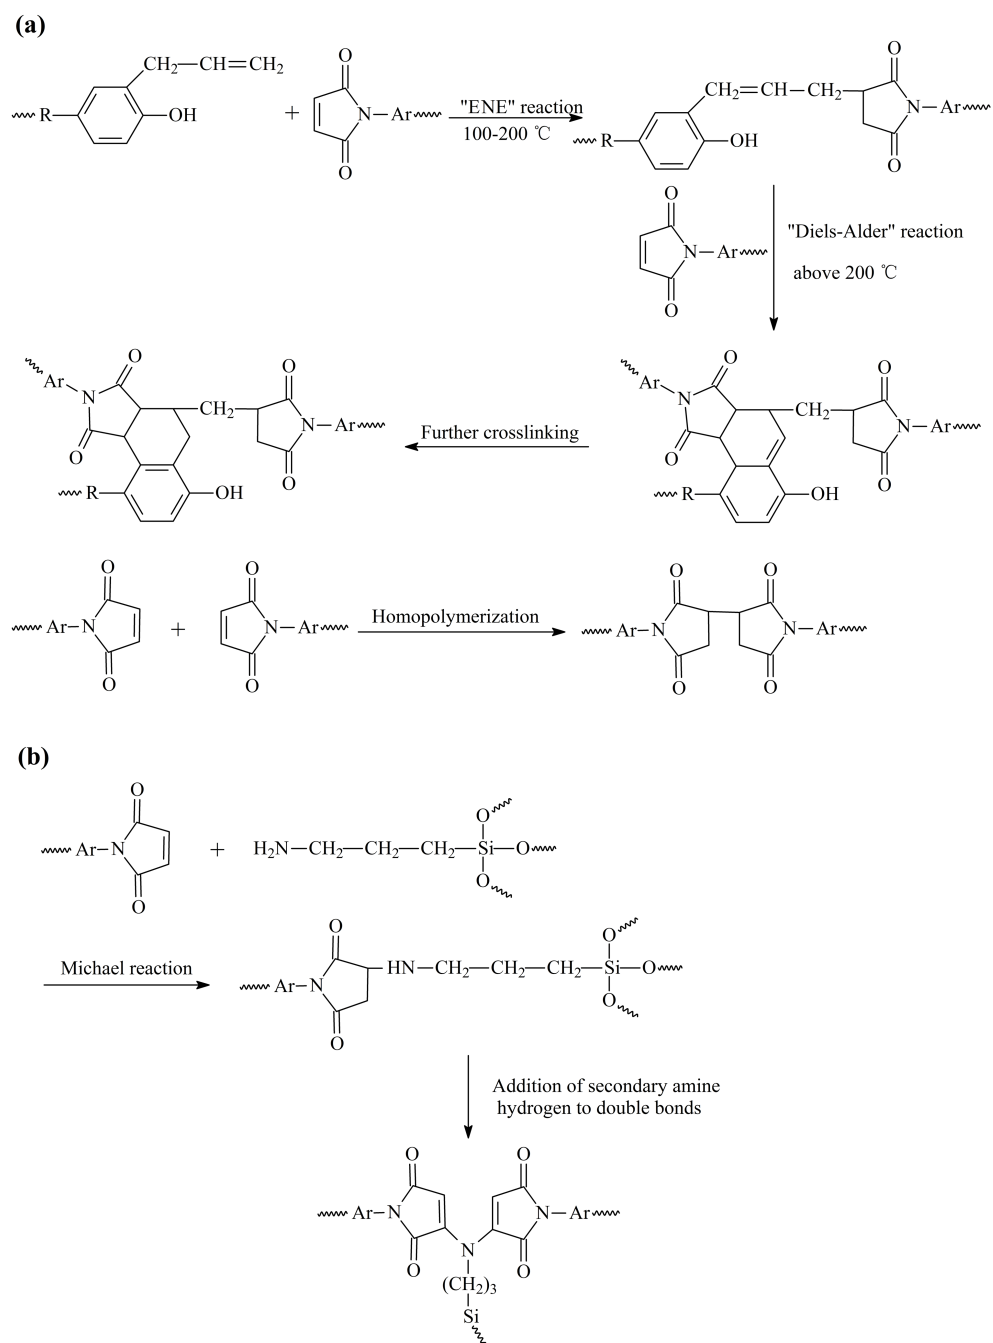

Scheme 1S The chemical reactions among BDM, DBA and Am-HPSi

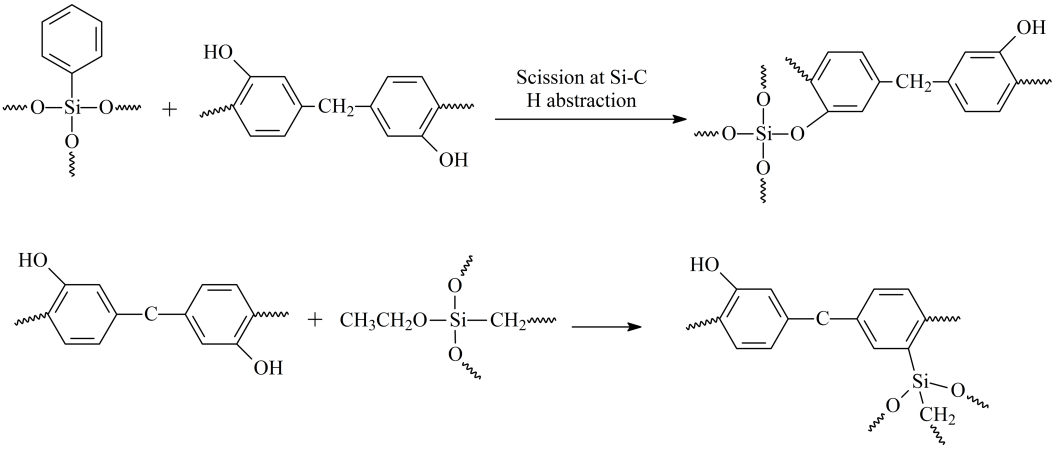

Scheme 2S The cross-linking reactions between Am-HPSi and BDM/DBA resin
